# Supplementary material
Source: ML conference proceedings conference paper supplement (https://openaccess.thecvf.com/content/CVPR_2019/html/Liu_Normalized_Diversification_CVPR_2019_paper.html)
Supplement: Supplementary file 1 [file Liu_Normalized_Diversification_CVPR_2019_supplemental.pdf]

## Appendix

### A. More Implementation Details

Code will be made available.

#### A.1. Synthetic datasets

For fair comparison, we directly used the experimental setting and the evaluation protocol in [12]. The 2D ring has 8 Gaussian grid (std=0.05) equally distributed on a circle with  $r = 2$ , while the 2D grid has 5x5 Gaussian grid (std=0.1) equally distributed in a 8x8 square.

#### A.2. RGB Hand datasets

Our experiments were conducted on three datasets. First, we augmented a large-scale synthetic hand dataset. Then, we tested our method on two real datasets.

**GANerated Hands [7].** This dataset is a synthetic dataset with 332k RGB images for hands. Those images were translated from SynthHands [8] via cycle consistency [2]. We collected frequently interacted objects from COCO [5] and inserted it onto the images without objects to form a new set of with-object data. In this way, we could get the object masks with visibility annotation. Note that currently there is no dataset with visibility annotation available ([13] does not release their used dataset). For the experiments, we equally (50/50) split the train/test set. The final dataset consists of 143k images for training.

**Stereo Hand Benchmark [14].** This dataset consists of 12 sequences including 36k rgb images without hand-object interactions. For the experiments, we used the conventional split in [16] for direct comparison, where 10 sequences with 30k images were used for training and the rest were used for testing.

**First-person Hand Action Benchmark (FPHAB) [1].** This large-scale dataset has 1200 sequences. We used the 280 sequences on hand-object interaction with 6-DOF object annotations. Specifically, we used 227 sequences with 17k images for training and 53 sequences with 4k images for testing.

#### A.3. Network architecture

For the experiments on synthetic Gaussian datasets, image generation and text-to-image translation, we directly borrow the architecture of the baseline methods [12, 9, 10] respectively for fair comparison. For the task of hand pose estimation, our network architecture is illustrated in Figure 1. We used the same design protocol as [7, 11], where 2D

heatmap was first estimated to guide the 3D joint predictions. When computing the  $l_2$  distance, only visible joints were considered.

#### A.4. Differentiable 2D projection

We used the projected 2D heatmap in the image-pose GAN formulation. However, it is worth noting that simply projecting and transferring the predicted 3D joints into 2D heatmap is non-differentiable. To get the meaningful gradient, we employed the differentiable image sampling technique in [3]. In this way, we could reparametrize the 2D heatmap with respect to the predicted 3D pose.

#### A.5. More detailed experimental settings

**Image-to-image translation.** Our implementation is mainly based on the official code<sup>1</sup> provided by [15] where we adapted the same architectures for the generator and the discriminator. Compared to the original BicycleGAN [15] implementation, we removed the image encoder which maps the RGB images to a coding space for re-parametrizing the Gaussian distribution and replaced the instance normalization with spectral normalization [6]. We followed the same train/val/test split setting as [15]. We trained our model with a batch size of 8 for 325 epochs. We used  $\alpha = 0.8$  for normalized diversity loss and 2.0 as L1 reconstruction weighted factor. During training, we randomly sampled 6 codes from the latent space to compute the diversity loss. Our initial learning rate was  $2e-4$  which was decayed by 0.1 for every 200 epochs. For quantitative evaluation, we randomly selected 100 images from validation set and sampled 38 outputs for each input image.

## B. More Qualitative Results

We show more qualitative results on multimodal hand pose estimation from RGB images in Figure 2.

---

<sup>1</sup><https://github.com/junyanz/BicycleGAN>

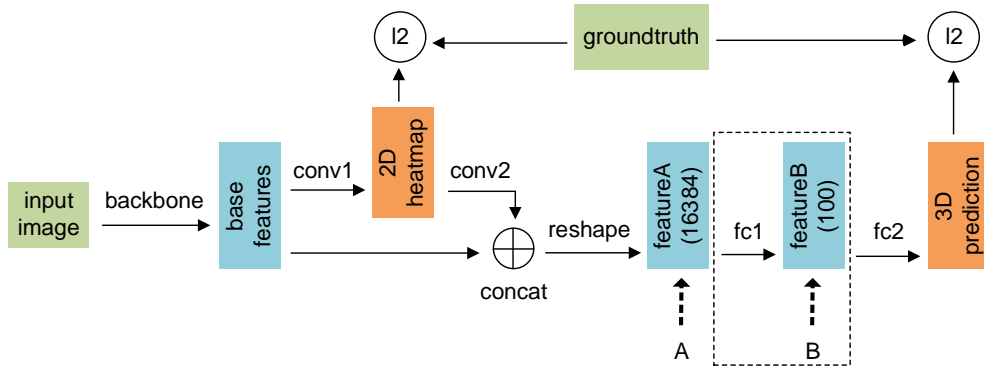

Figure 1: Network architecture for hand pose estimation. For the **backbone**, we directly borrow the architecture from [7]. Following the design protocol of [7, 11], we use the extracted **base features** to first reconstruct the **2D heatmap**. Then the predicted heatmap is concatenated with the base features. ‘A’ and ‘B’ denote where the noise vector  $z \in \mathbb{R}^{10}$  is included via concatenation in ‘Ours+’ and ‘Ours’ respectively. The part in the dashed line, which is a bottleneck structure, is not used in ‘Ours+’. Only visible joints contribute to the  $l_2$  distance for both the 2D heatmap and 3D predictions. Specifically, the input image is sized 128x128. ‘conv1’ denotes one stride-1 conv layer and two stride-2 deconv layers. ‘conv2’ denotes two stride-2 conv layers. Both ‘fc1’ and ‘fc2’ denotes two sequential fc layers. The final 3D predictions has a dimension of 21x3=63.

VAE 3D  
Predictions

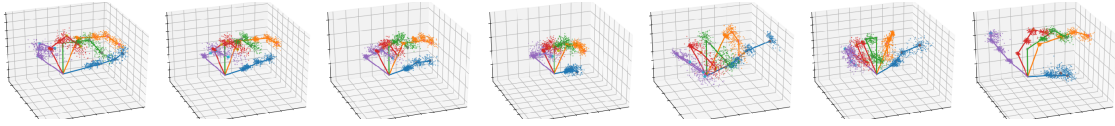

VAE 2D  
Projections

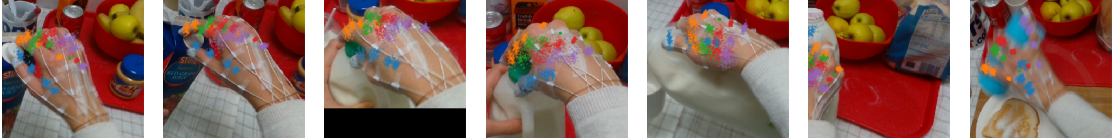

Ours 3D  
Predictions

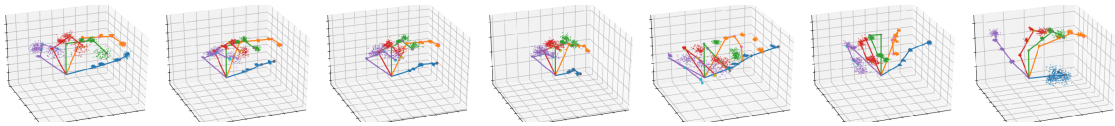

Ours 3D  
Projections

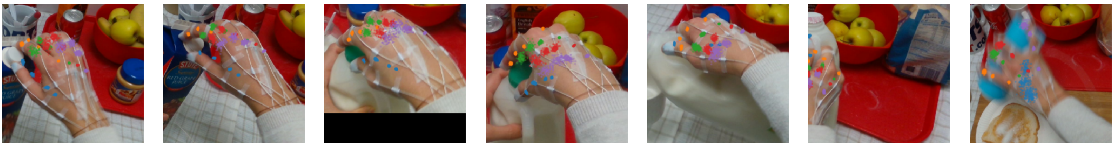

VAE 3D  
Predictions

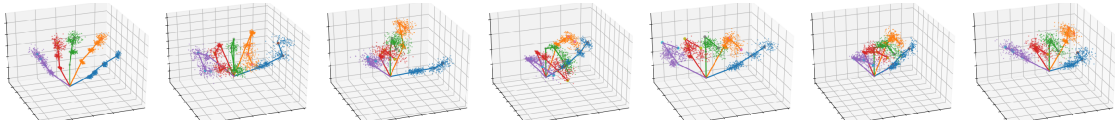

VAE 2D  
Projections

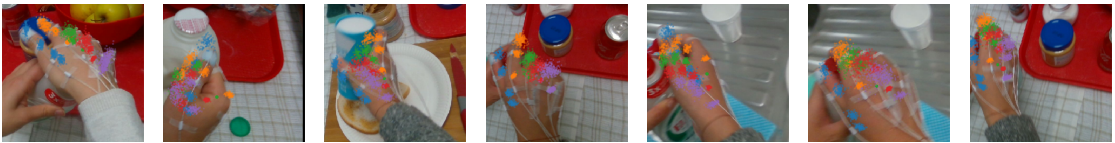

Ours 3D  
Predictions

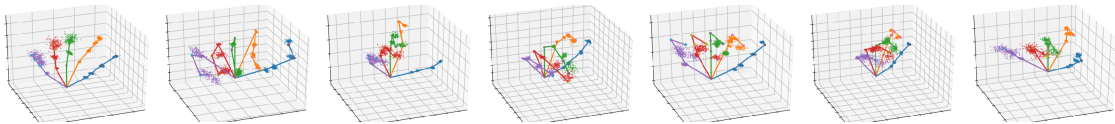

Ours 3D  
Projections

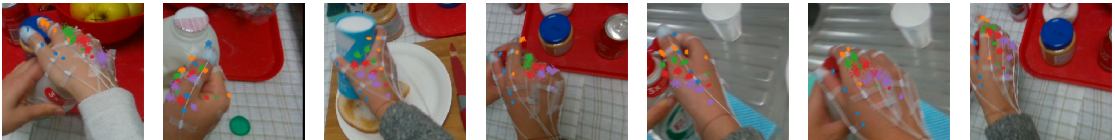

Figure 2: More qualitative comparison between VAE [4] and our method on 3D hand predictions and its projections on 2D image (better viewed when zoomed in).

## References

- [1] G. Garcia-Hernando, S. Yuan, S. Baek, and T.-K. Kim. First-person hand action benchmark with rgb-d videos and 3d hand pose annotations. In *CVPR*, 2018. 1
- [2] P. Isola, J.-Y. Zhu, T. Zhou, and A. A. Efros. Image-to-image translation with conditional adversarial networks. In *CVPR*, 2017. 1
- [3] M. Jaderberg, K. Simonyan, A. Zisserman, et al. Spatial transformer networks. In *NIPS*, pages 2017–2025, 2015. 1
- [4] D. P. Kingma and M. Welling. Auto-encoding variational bayes. *arXiv preprint arXiv:1312.6114*, 2013. 3
- [5] T.-Y. Lin, M. Maire, S. Belongie, J. Hays, P. Perona, D. Ramanan, P. Dollár, and C. L. Zitnick. Microsoft coco: Common objects in context. In *ECCV*, pages 740–755. Springer, 2014. 1
- [6] T. Miyato, T. Kataoka, M. Koyama, and Y. Yoshida. Spectral normalization for generative adversarial networks. In *ICLR*, 2018. 1
- [7] F. Mueller, F. Bernard, O. Sotnychenko, D. Mehta, S. Sridhar, D. Casas, and C. Theobalt. Generated hands for real-time 3d hand tracking from monocular rgb. In *CVPR*, pages 49–59, 2018. 1, 2
- [8] F. Mueller, D. Mehta, O. Sotnychenko, S. Sridhar, D. Casas, and C. Theobalt. Real-time hand tracking under occlusion from an egocentric rgb-d sensor. In *ICCV*, volume 10, 2017. 1
- [9] A. Radford, L. Metz, and S. Chintala. Unsupervised representation learning with deep convolutional generative adversarial networks. *arXiv preprint arXiv:1511.06434*, 2015. 1
- [10] S. Reed, Z. Akata, X. Yan, L. Logeswaran, B. Schiele, and H. Lee. Generative adversarial text to image synthesis. In *ICML*, pages 1060–1069, 2016. 1
- [11] S.-E. Wei, V. Ramakrishna, T. Kanade, and Y. Sheikh. Convolutional pose machines. In *CVPR*, pages 4724–4732, 2016. 1, 2
- [12] C. Xiao, P. Zhong, and C. Zheng. Bourgan: Generative networks with metric embeddings. In *NeurIPS*, 2018. 1
- [13] Q. Ye and T.-K. Kim. Occlusion-aware hand pose estimation using hierarchical mixture density network. In *ECCV*, 2018. 1
- [14] J. Zhang, J. Jiao, M. Chen, L. Qu, X. Xu, and Q. Yang. 3d hand pose tracking and estimation using stereo matching. *arXiv preprint arXiv:1610.07214*, 2016. 1
- [15] J.-Y. Zhu, R. Zhang, D. Pathak, T. Darrell, A. A. Efros, O. Wang, and E. Shechtman. Toward multimodal image-to-image translation. In *NIPS*, pages 465–476, 2017. 1
- [16] C. Zimmermann and T. Brox. Learning to estimate 3d hand pose from single rgb images. In *ICCV*, pages 4913–4921. IEEE, 2017. 1
